# Supplementary material
Source: MDPI journal article supplement (https://www.mdpi.com/2036-7481/14/3/79)
Supplement: s1 [file s1]

## Supplementary materials

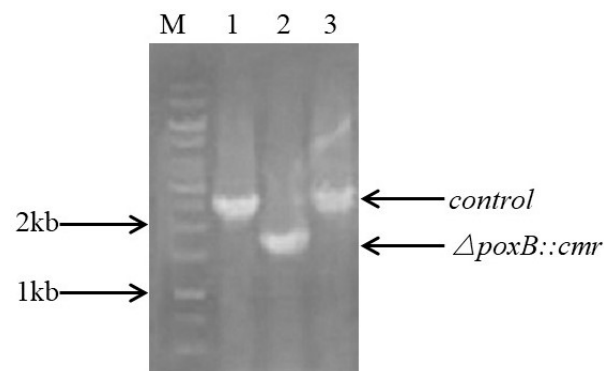

**Figure S1.** Agarose gel electrophoresis for *poxB* deletion in *E. coli*. 1 kb DNA Ladder (TransGen, China) was employed and SolarRed (Solarbio, China) was added to the gel before electrophoresis to a final concentration of 0.1  $\mu\text{L/mL}$ .

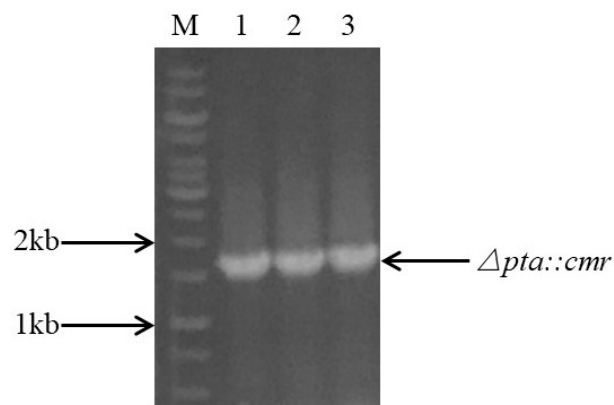

**Figure S2.** Agarose gel electrophoresis for *pta* deletion in *E. coli*. 1 kb DNA Ladder (TransGen, China) was employed and SolarRed (Solarbio, China) was added to the gel before electrophoresis to a final concentration of 0.1  $\mu\text{L/mL}$ .

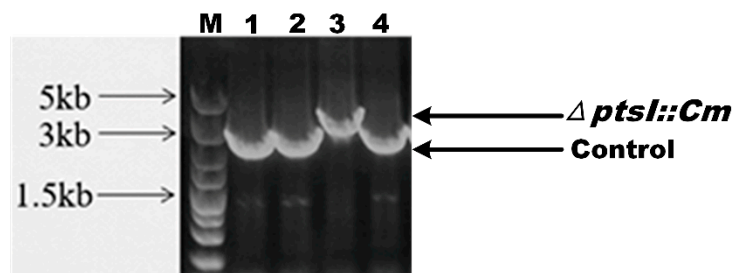

**Figure S3.** Agarose gel electrophoresis for *ptsI* deletion in *E. coli*. DL5000 DNA Marker (TransGen, China) was employed and SolarRed (Solarbio, China) was added to the gel before electrophoresis to a final concentration of 0.1  $\mu\text{L/mL}$ .

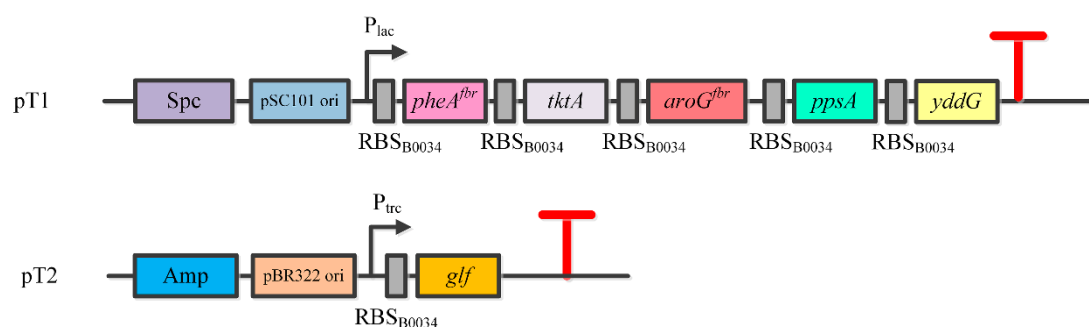

**Figure S4.** The organization of plasmids pT1 and pT2.

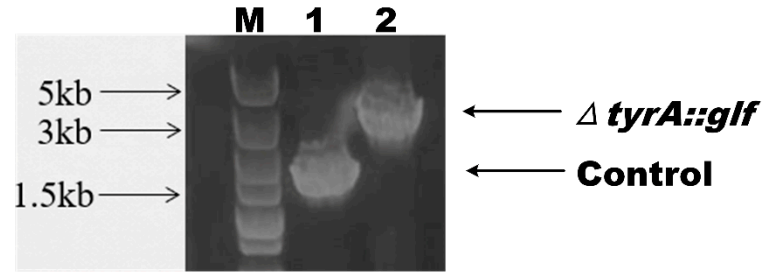

**Figure S5.** Agarose gel electrophoresis for replacing *tyrA* with *glf* in *E. coli*. DL5000 DNA Marker (TransGen, China) was employed and SolarRed (Solarbio, China) was added to the gel before electrophoresis to a final concentration of 0.1  $\mu\text{L/mL}$ .

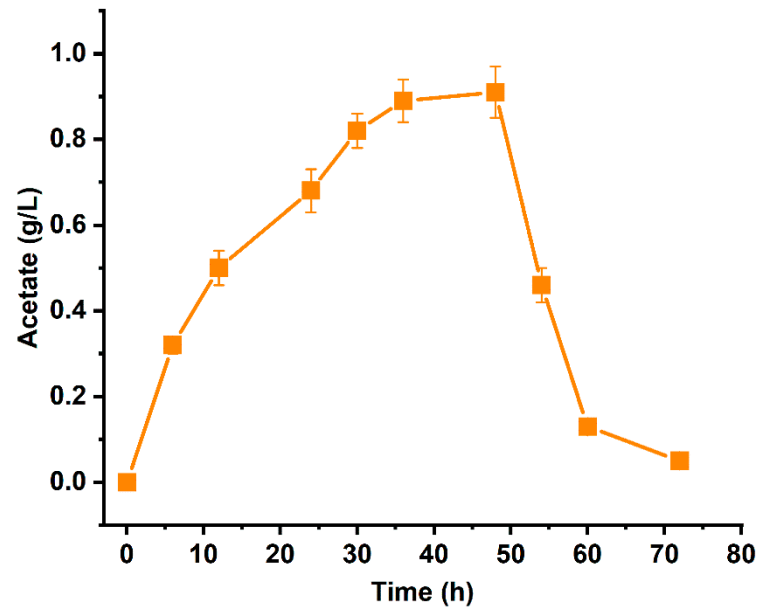

**Figure S6.** Acetate accumulation of MPH-3 in batch fermentation. The error bars represent standard deviations from three replicate fermentations.

**Table S1.** Primers used in this study.

| Primers    | Sequence (5'-3')                                                        |
|------------|-------------------------------------------------------------------------|
| poxB-QF    | TCAGATGAACTAACTTGTACCGTTATCACATTGAGGAGATGGAGAACCGTGTAGGCTG-GAGCTGCTTC   |
| poxB-QR    | CATGGCATGTCCTTATTATGACGGGAAATGCCACCCTTTATGGGAATTAGCCATGGTCC             |
| poxB-JF    | ATACGGTGAGCAGCACAAATGA                                                  |
| poxB-JR    | GTCTATGGGTTGCGGTTGAATACTGCC                                             |
| pta-QF     | GGTGCTGTTTTGTAACCCGCCAAATCGGCGGTAACGAAAGAGGATAAACCGTGTAGGCTG-GAGCTGCTTC |
| pta-QR     | TTATTTCCGGTTCAGATATCCGCAGCGCAAAGCTGCGGATGATGACGAGAATGGGAATT-AGCCATGGTCC |
| pta-JF     | CAATGGACGTTTACTGCCACC                                                   |
| pta-JR     | CCAGGTGGCAAGGCTGGTTAA                                                   |
| PtsI-QF    | AATTTCCCGGGTTCTTTTAAAAATCATCACAAGTAAGGTAGGGTTGTGTAGGCTGGAGCTGCTTC-      |
| PtsI-QR    | CCCATGATCTTCTCCTAAGCAGTAAATTTGGGCCCATCTCGTGAATGGGAATTAGCCATGGTCC        |
| ptsI-JF    | CTACCATCATCGGGTGAGCGTTAT                                                |
| ptsI-JR    | AAGGGACTGGCGACCTGTTTT                                                   |
| TyrA-cmr-F | TCAGGATCTGAACGGGCAGCTGACGGCTCGCGTGGCTTAAGAGGTTTATTGTGTAGGCTG-GAGCTGCTTC |
| cmr-R      | CTCTAGTAGCTAGCATAATACCTAGGACTGAGCTAGCTGTAAAATGGGAATTAGCCATGGTCC         |

---

|             |                                                                    |
|-------------|--------------------------------------------------------------------|
| cmr-glf-F   | TCAGTCCTAGGTATTATGCTAGCTACTAGAGAAGGAGATATACATATGAGTTCTGAAAGTAGTCAG |
| glf-tyrA-R  | CAACCTGATGAAAAGGTGCCGGATGATGTGAATCATCCGG                           |
|             | CACTGGATTACTACTTCTGGGAGCGCCACATCTCCT                               |
| TyrA-cmr-NF | GATGCCTGCATTAGCTGGGAAATGACCGATGCCTTGCTGCGTGAAATTCATCAG-            |
|             | GATCTGAACGGGCAGC                                                   |
| glf-tyrA-NR | AATGAAGGTATTGGGCTGTTACCCAAGTGAGAACGTAGT                            |
|             | GCCTGTTGATCCAACCTGATGAAAAGGTGCC                                    |
| TyrA-JF     | TTCCAATAAAGATTATCGCCGTCAG                                          |
| TyrA-JR     | GGTTGAAGCGTTGCTGGTACTGC                                            |

---

**Table S2.** Batch-fermentation parameters for constructed *E. coli*.

| Strains | Maximum OD <sub>600</sub> | L-Phenylalanine (g/L) | Acetate (g/L) |
|---------|---------------------------|-----------------------|---------------|
| MG-3    | 12.32±0.56                | 0.57±0.07             | 4.64±0.13     |
| MG-4    | 11.89±0.26                | 0.59±0.05             | 3.13±0.23     |
| MG-5    | 11.87±0.38                | 0.77±0.05             | 1.02±0.16     |
| MPH-2   | 10.38±0.40                | 1.46±0.18             | 0.65±0.08     |

---
